# Supplementary material for: Transcriptome Analysis Revealed The Mechanism of Exogenous ABA Increasing Anthocyanins in Blueberry Fruit During Veraison
Source: Research Square preprint supplement (doi:10.21203/rs.3.rs-88852/v1), 2020-10-13
Supplement: Supplementary file 1 [file 6f955b62b2e8fa06e4ca9fd1.xlsx]

## Sheet: Sheet1
geneID	Sence	AntiSense
VaccDscaff13-snap-gene-106.35	GTGAGAAAGGGTGCTTGGAC	GCCTTGTAGGGAACTTGGTG
VaccDscaff13-snap-gene-106.36	GGATAACGGTGAAGAAGCAA	AAGGTCCACATTGTCCATAAAA
VaccDscaff20-snap-gene-232.35	TATCATTCTGCTACAGCCTAC	GATGTCTGGACGAAGATAGTT
VaccDscaff1486-snap-gene-0.3	GGATAACGGTGAAGAAGCAA	AAGGTCCACATTGTCCATAAAA
VaccDscaff42-augustus-gene-203.27	CATAGTTCCGCTACAAATCA	CACAAGGCACCTTAACAAAT
VaccDscaff44-augustus-gene-196.26	AGACACGAATAAAGGAGCAT	AATCCATCTTAGCCTACAAC
VaccDscaff28-augustus-gene-197.19	AGACACGAATAAAGGAGCAT	AATCCATCTTAGCCTACAAC
VaccDscaff19-augustus-gene-5.35	CGACAATAACTCCTCCATCC	TCCTGACCTCTACCTCGTTC
VaccDscaff20-augustus-gene-6.38	TCGGCTGATGGATCTGTGAG	ATCGGAGTAAAGGAGTGTCTGG
VaccDscaff28-augustus-gene-346.33	GAGGGTAGTTTACCTTTCAGTT	ATTATTCGCTCAGGAGTAGG
VaccDscaff48-augustus-gene-105.36	CCTACCCACTCTACGCCACT	CGCGGTTGTTGTATTCTTCA
